# Supplementary material for: Safety and efficacy of a freeze-dried trivalent antivenom for snakebites in the Brazilian Amazon: An open randomized controlled phase IIb clinical trial
Source: PLoS Negl Trop Dis. 2017 Nov 27;11(11):e0006068. doi: 10.1371/journal.pntd.0006068 (PMC5720814; doi:10.1371/journal.pntd.0006068)
Supplement: S1 Dataset — (XLSX) [file pntd.0006068.s002.xlsx]

## Sheet: Sheet1
tipo de soro (1=LTSBA), (2=BMHA)	Fibrinogen	Clotting time		tempo em horas
1	4	4
1	12	4
1	12	4
1	12	4
1	12	4
1	12	4
1	12	4
1	12	4
1	12	4
1	12	12
1	12	12
1	12	12
1	12	12
1	12	12
1	24	12
1	24	12
1	24	12
1	24	12
1	24	12
1	24	12
1	24	12
1	24	12
1	24	12
1	24	12
1	24	12
1	24	12
1	24	12
1	24	12
1	24	12
1	24	12
1	24	12
1	24	24
1	24	24
1	24	24
1	24	24
1	24	24
1	24	24
1	24	24
1	24	24
1	24	24
1	24	24
1	24	24
1	24	24
1	24	24
1	24	24
1	24	24
1	24	24
1	24	24
1	24	24
1	24	24
1	24	24
1	24	24
1	24	24
1	24	24
1	24	24
1	24	24
1	24	24
1	24	24
2	4	4
2	12	4
2	12	4
2	12	4
2	12	12
2	12	12
2	12	12
2	12	12
2	12	12
2	12	12
2	12	12
2	24	12
2	24	12
2	24	12
2	24	12
2	24	12
2	24	12
2	24	12
2	24	12
2	24	12
2	24	12
2	24	12
2	24	12
2	24	12
2	24	12
2	24	24
2	24	24
2	24	24
2	24	24
2	24	24
2	24	24
2	24	24
2	24	24
2	24	24
2	24	24
2	24	24
2	24	24
2	24	24
2	24	24
2	24	24
2	24	24
2	24	24
2	24	24
2	24	24
